# Supplementary material for: Engineering vascularized dermal grafts by integrating a biomimetic scaffold and Wharton's jelly MSC-derived endothelial cells
Source: Royal Society of Chemistry journal article supplement (doi:10.1039/d1tb00857a), 2021-01-01
Supplement: d1tb00857a1.pdf [file d1tb00857a1.pdf]

## ***Supporting information***

***for***

### **Engineering vascularized dermal grafts by integrating a biomimetic scaffold and Wharton's jelly MSCs-derived endothelial cells**

Xiufang Li,<sup>a,b,1</sup> Renchuan You,<sup>a,b,1</sup> Qiang Zhang,<sup>b</sup> Shuqin Yan,<sup>b</sup> Zuwei Luo,<sup>b</sup> Jing Qu<sup>a</sup> and Mingzhong Li<sup>\*a</sup>

<sup>a</sup>National Engineering Laboratory for Modern Silk, College of Textile and Clothing Engineering, Soochow University, Suzhou 215123, China

<sup>b</sup>State Key Laboratory for Hubei New Textile Materials and Advanced Processing Technologies, School of Textile Science and Engineering, Wuhan Textile University, Wuhan 430200, China

*#Both authors contributed equally to this work.*

*\*Corresponding authors:*

Prof. Mingzhong Li (E-mail: [mzli@suda.edu.cn](mailto:mzli@suda.edu.cn))

Table S1. Sequences of primers used in real-time PCR.

---

|                |                              |
|----------------|------------------------------|
| <b>GAPDH-F</b> | <b>GTCACTGGTGGACCTGACCT</b>  |
| <b>GAPDH-R</b> | <b>AGGGGTCTACATGGCAACTG</b>  |
| <b>CD31-F</b>  | <b>GGTGGATGAGGTCCAGATTTC</b> |
| <b>CD31-R</b>  | <b>CAGCACAATGTCCTCTCCAG</b>  |
| <b>VEGF-F</b>  | <b>GCTCAGAGCGGAGAAAGCAT</b>  |

---

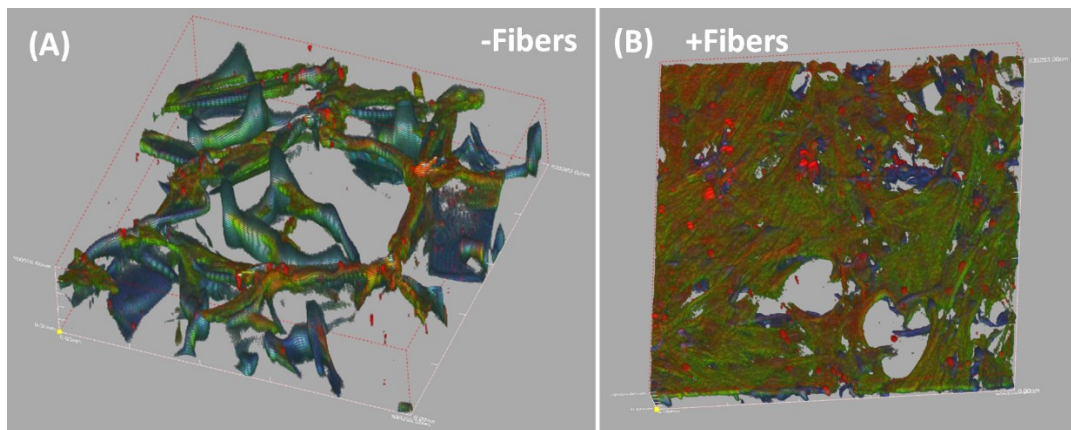

Figure S1. 3D confocal images of the cells-seed scaffolds. (A) the scaffold without nanofibrous structure, (B) the scaffold with fibrous microstructure.

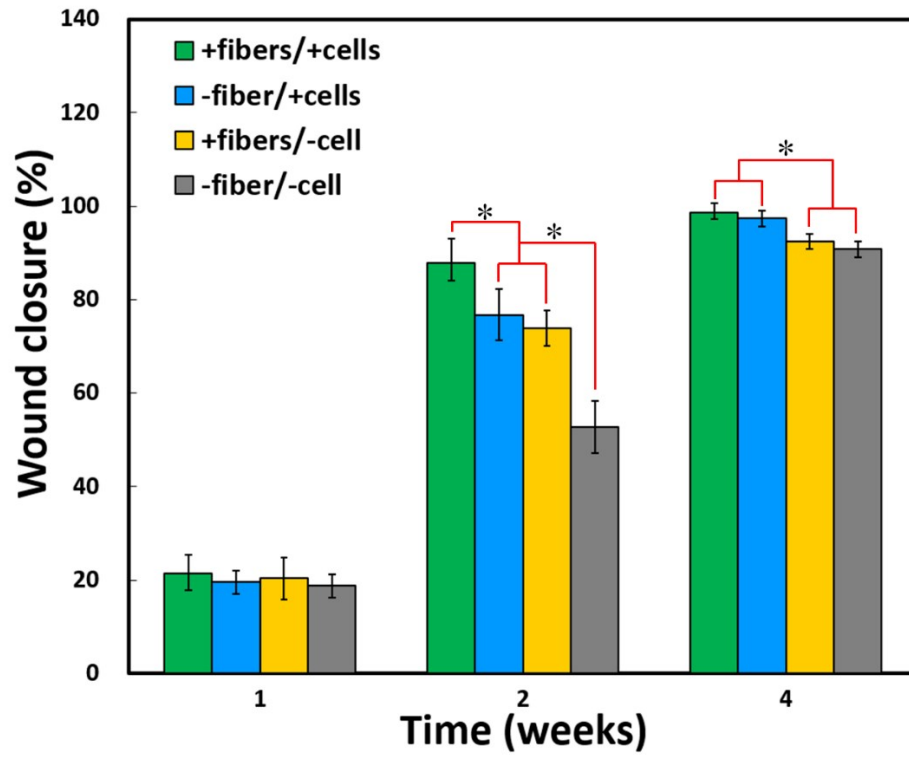

Figure S2. Quantitative evaluation of wound closure at different time points ( $*p < 0.05$ ,  $n=3$ ).
